# Supplementary material
Source: Royal Society of Chemistry journal article supplement (doi:10.1039/d6cc02778d)
Supplement: d6cc02778d1.pdf [file d6cc02778d1.pdf]

## Supplementary Materials for

### ***In situ* construction of ZnP<sub>2</sub>/CuP<sub>2</sub> heterojunction for efficient Nitrate-to-ammonia electroreduction**

Huihui Zhu,<sup>a</sup> Jun Ma,<sup>\*b</sup> Shuaishuai Zhang,<sup>b</sup> Hanke Song,<sup>c</sup> Wenyong Zhu,<sup>\*a</sup> and Teng Chen<sup>\*a</sup>

<sup>a</sup> Universities' Key laboratory of functional materials for production, storage and utilization of industrial by-product hydrogen in Jiangsu, School of Material and Chemical Engineering, Xuzhou University of Technology, Xuzhou 221018, China.

E-mail: chentyp@nju.edu.cn, zwyong@xzit.edu.cn

<sup>b</sup> Air Force Logistics Academy, Xuzhou 221000, China.

E-mail: manudt@163.com

<sup>c</sup> School of Materials Science and Physics, China University of Mining and Technology, Xuzhou 221116, China.

## Experimental Section

**Preparation of Zn-ZIF-8.** 1.332 g of  $\text{Zn}(\text{NO}_3)_2 \cdot 6\text{H}_2\text{O}$  was dissolved in 40 mL of deionized water to form solution A. In solution B, 8 g of 2-methylimidazole (MeIM) was added to 120 mL of deionized water. Solution B was then rapidly poured into solution A and vigorously stirred for 3 min. The mixture was allowed to set at room temperature for 2 h. After washing several times with deionized water and ethanol, the product was collected by suction filtration and dried under vacuum at 50 °C overnight. Subsequently, 200 mg of the obtained powder was dispersed in 30 mL of water and ultrasonicated at room temperature for 30 min. After forming a uniform dispersion, 2 mL of an aqueous tannic acid solution ( $5 \text{ mg mL}^{-1}$ ) was added and stirred at room temperature for 30 min. The resulting ZIF-8 nanocrystals were collected by centrifugation and dried under vacuum at 50 °C overnight.

**Fabrication of the  $\text{ZnP}_2$  catalyst.** 0.4 g of the as-prepared Zn-ZIF-8 powder and 1.2 g of  $\text{NaH}_2\text{PO}_2 \cdot 2\text{H}_2\text{O}$  were placed at downstream and upstream of an open alumina crucible, respectively. The mixture in the crucible was then heated in flowing  $\text{N}_2$  atmosphere at a heating rate of 2 °C/min to 400 °C and held at this temperature for 2 h, followed by natural cooling to room temperature to obtain the  $\text{ZnP}_2$  catalyst.

**Fabrication of the  $\text{CuP}_2/\text{ZnP}_2$  heterostructure.** The  $\text{CuP}_2/\text{ZnP}_2$  heterostructure was obtained *via* an ion exchange method based on the Kirkendall effect. Specifically, 190 mg of  $\text{CuCl}_2 \cdot \text{H}_2\text{O}$  and 20 mg of ascorbic acid were dissolved in 60 mL of methanol solution. Then, 50 mg of the prepared  $\text{ZnP}_2$  was dispersed in the above solution. After ultrasonication for 15 min, the resulting mixture was transferred into a 100 mL Teflon-lined autoclave and heated at 160 °C for different time (4, 8, and 15 h) to prepare heterostructures with different  $\text{ZnP}_2/\text{CuP}_2$  ratios.

**Physical characterization.** We obtained X-ray diffraction (XRD) patterns through a Phillips X'pert Pro diffractometer with  $\text{Co K}\alpha$  radiation at 40 kV and 35 mA. The FESEM images were collected using a field emission scanning electron microscopy ZEISS Merli. The high resolution TEM images were performed on a ThermoFisher Talos F200X transmission electron microscope. The X-ray photoelectron spectroscopy (XPS) was recorded using a PHI 5000 Versa Probe equipped with a hemispherical electron analyzer and monochromatic  $\text{Al K}\alpha$  X-ray exciting source. The bonding energy (BE) calibration of the spectra was referred to the C 1s peak located at  $\text{BE} = 284.6 \text{ eV}$  for the analysis. The Potential-dependent Raman spectra were determined by Confotec MR 520 using a 532 nm laser with an acquisition time of 5 s.

**Electrochemical measurements.** The  $\text{eNO}_3\text{RR}$  performance of  $\text{ZnP}_2/\text{CuP}_2$  catalysts were recorded using a three-electrode system on an electrochemical workstation (CHI 660f). Pt mesh and  $\text{Ag}/\text{AgCl}$  electrode were used as counter electrode and reference electrode, respectively.

To prepare the working electrodes, synthesized  $\text{ZnP}_2/\text{CuP}_2$  catalysts powder samples (5 mg) were dispersed in the mixed solution of 970  $\mu\text{L}$  ethanol and 30  $\mu\text{L}$  Nafion solution (10 wt %). Thereafter, the mixed solution was sonicated for 30 minutes to acquire a homogeneous catalyst suspension. Finally, 10  $\mu\text{L}$  of catalyst suspension was cast onto the surface of the glassy carbon electrode with 5 mm diameter, and the working electrode was naturally dried at room temperature. The catalyst loading on the glassy carbon electrode was calculation as  $0.255 \text{ mg cm}^{-2}$ . Cyclic voltammetry (CV) was conducted at the potential of 0.355-1.635 V (*vs.* RHE) with a scan rate of  $50 \text{ mV s}^{-1}$  in 0.1 M  $\text{Na}_2\text{SO}_4$  electrolyte.  $\text{eNO}_3\text{RR}$  polarization curves were collected in 0.1 M  $\text{Na}_2\text{SO}_4$  and 0.1 M  $\text{NaNO}_3$  mixed electrolyte with a scan rate of  $10 \text{ mV s}^{-1}$ . Chronoamperometry test was performed at  $-0.365 \text{ V vs. RHE}$ .

**Detection of  $\text{NH}_3$ .** The  $\text{NH}_3$  concentration was determined by the ammonia photometric kit. An aliquot of the electrolytes after electrolysis was appropriately diluted with ammonia-free deionized water to fall within the linear range of the assay. 10 g of 5% salicylic acid and 11.395 g of 5% sodium citrate were added in 200 mL of 1 M NaOH solution to prepare Solution A. Then, 2 mL of Solution A and 1 mL of 0.05 M NaClO solution were mixed with 0.2 mL of 1% sodium nitroferricyanide solution thoroughly for colorimetry test. After incubating at room temperature for 120 min, the absorbance was recorded at a wavelength of 660 nm using a spectrophotometer. A standard curve was freshly prepared under identical conditions covering 0-2.0 ppm  $\text{NH}_4^+$  and the ammonia concentration in the sample was calculated from the standard curve.

**Detection of nitrite.** The  $\text{NO}_2^-$  concentration was determined by the naphthalene ethylenediamine hydrochloride method. In acidic medium, nitrite was diazotized with sulfanilamide and then coupled with N-(1-naphthyl)ethylenediamine dihydrochloride, producing a rose-red azo dye whose color intensity was measured spectrophotometrically. To prepare the mixed color reagent, 0.2 g of N-(1-naphthyl)ethylenediamine dihydrochloride and 4.0 g of sulfanilamide were dissolved in 50 mL of deionized water, and 10 mL of phosphoric acid was added. For quantification, the electrolyte sample was collected and diluted to fall within the detection range, then 40  $\mu\text{L}$  of the color reagent was added to 2.0 mL of the sample solution, mixed well, and allowed to stand at room temperature for 20 min. The UV-Vis absorbance was subsequently measured at 540 nm. A standard concentration-absorbance curve was constructed using  $\text{KNO}_2$  standards prepared in 1.0 M KOH solution at concentrations of 0, 0.20, 0.50, 1.00, 1.50, and 2.00 ppm, and the  $\text{NO}_2^-$  product concentration was calculated by referring the sample absorbance to this calibration curve.

The faradaic efficiency and yields of  $\text{NH}_3$  were measured using the hypochloricphenol method.

$$FE = \frac{8 \times F \times c_{\text{NH}_3} \times V}{17 \times Q}$$

$$\text{Yield} = \frac{V \times c_{\text{NH}_3}}{m \times t}$$

where the concentration of  $\text{NH}_3$  ( $c_{\text{NH}_3}$ ) were determined using UV-vis spectrophotometer and standard  $(\text{NH}_4)_2\text{SO}_4$  solution.

## Supplementary Figures

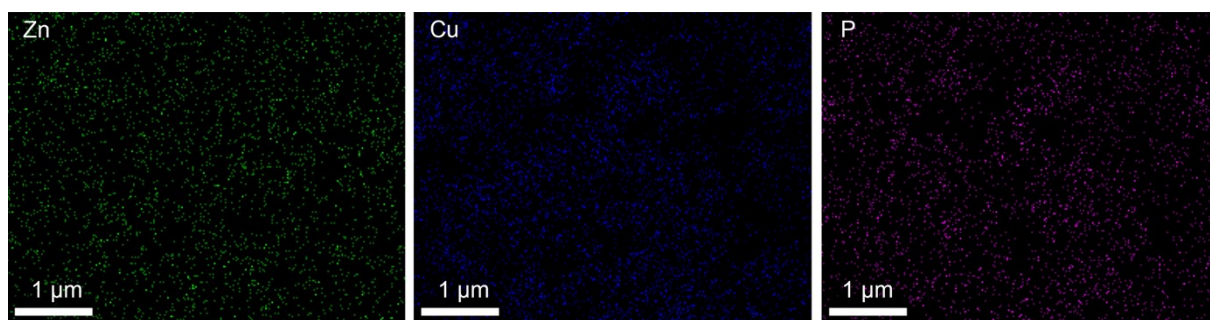

**Fig. S1.** SEM-EDS elemental mapping images of  $\text{Zn}_{0.4}\text{Cu}_{0.6}\text{P}_2$ .

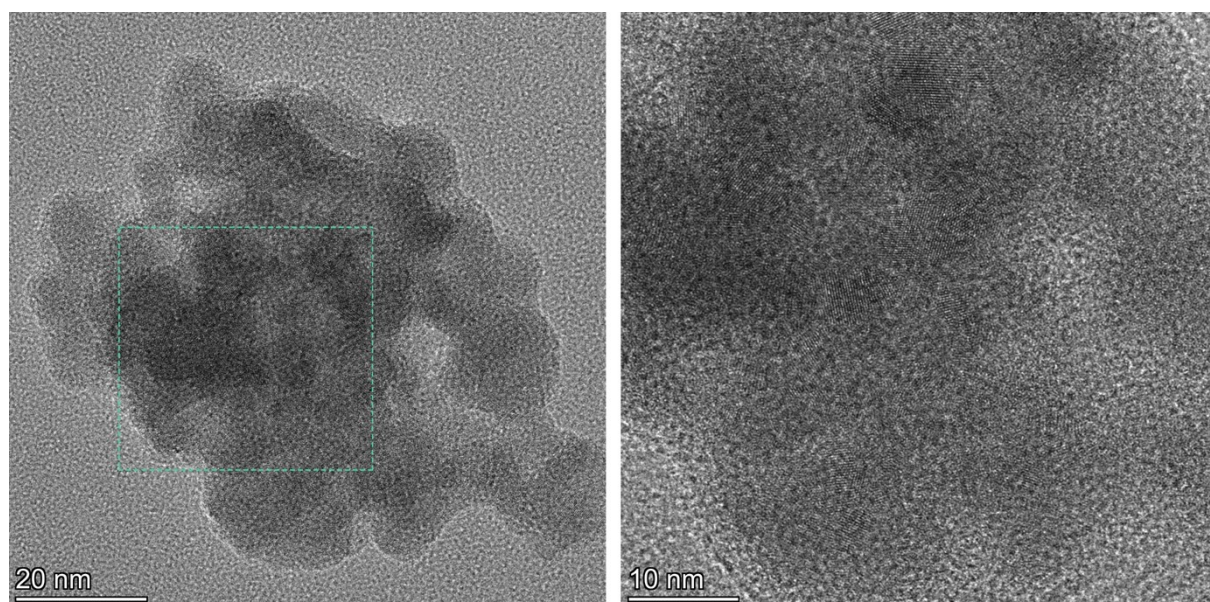

**Fig. S2.** TEM images of  $\text{Zn}_{0.4}\text{Cu}_{0.6}\text{P}_2$ .

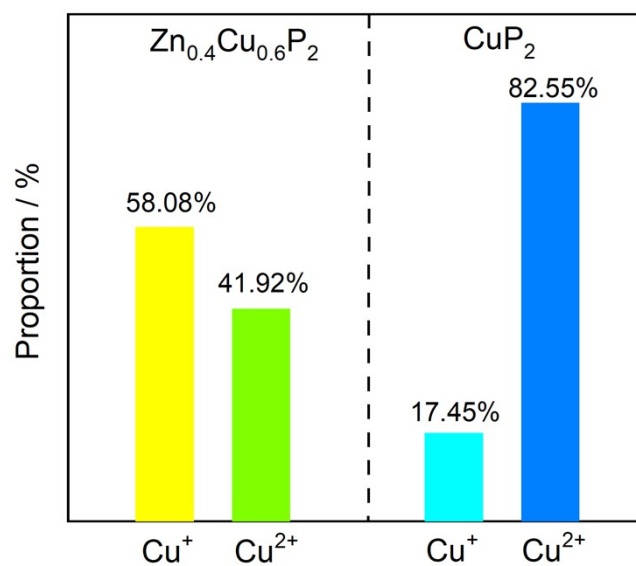

**Fig. S3.** Cu<sup>+</sup> and Cu<sup>2+</sup> proportion of CuP<sub>2</sub> and Zn<sub>0.4</sub>Cu<sub>0.6</sub>P<sub>2</sub> heterostructure.

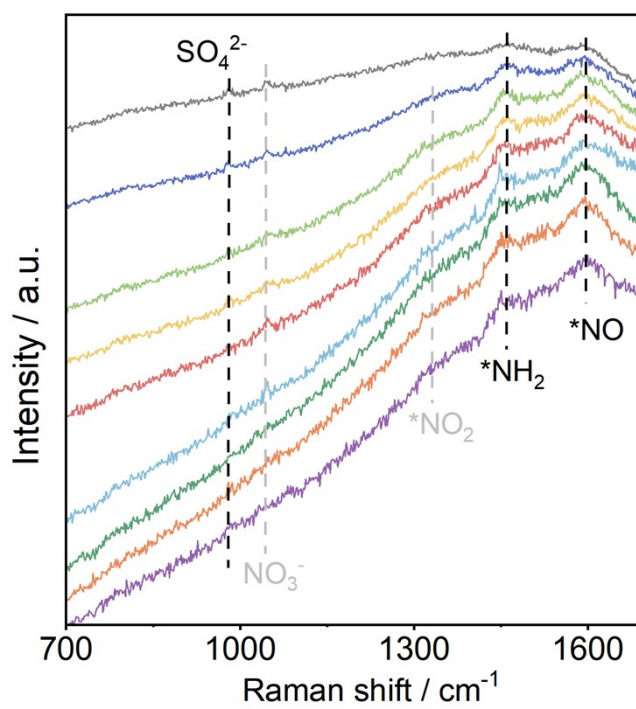

**Fig. S4.** The in situ Raman spectra of ZnP<sub>2</sub>.

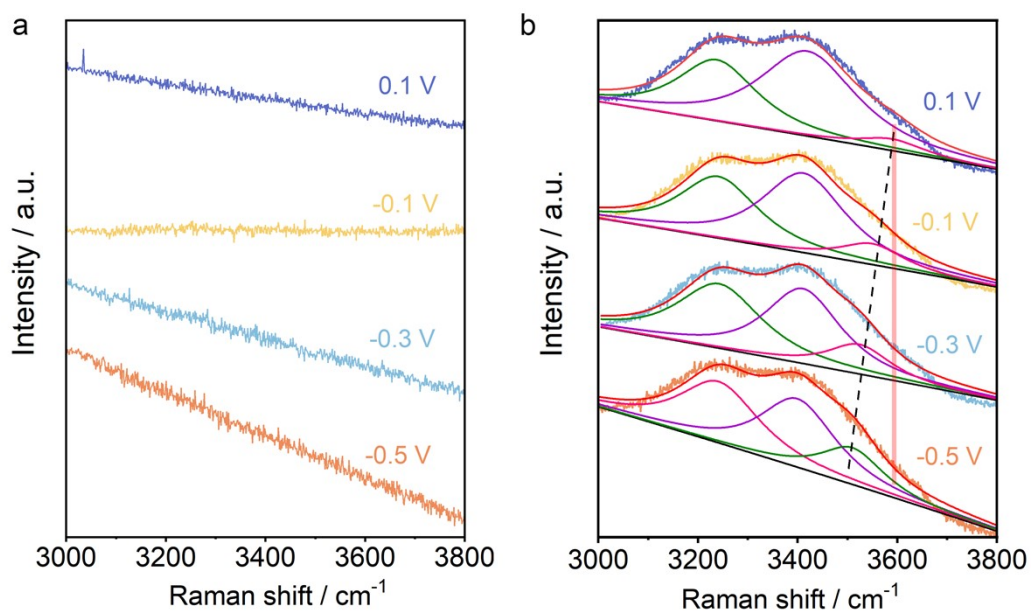

**Fig. S5.** The in situ Raman spectra of (a)  $\text{CuP}_2$  and (b)  $\text{ZnP}_2$ .

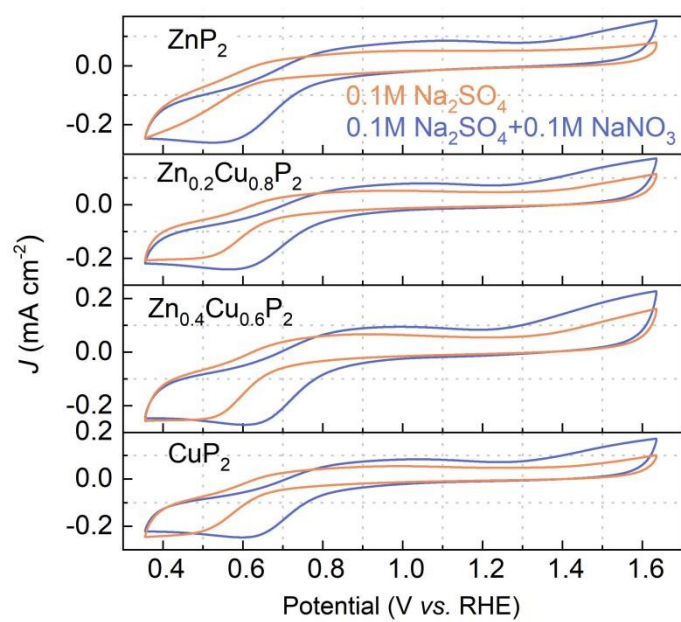

**Fig. S6.** CV curves of  $\text{ZnP}_2$ ,  $\text{CuP}_2$  and  $\text{CuP}_2/\text{ZnP}_2$  heterostructures.

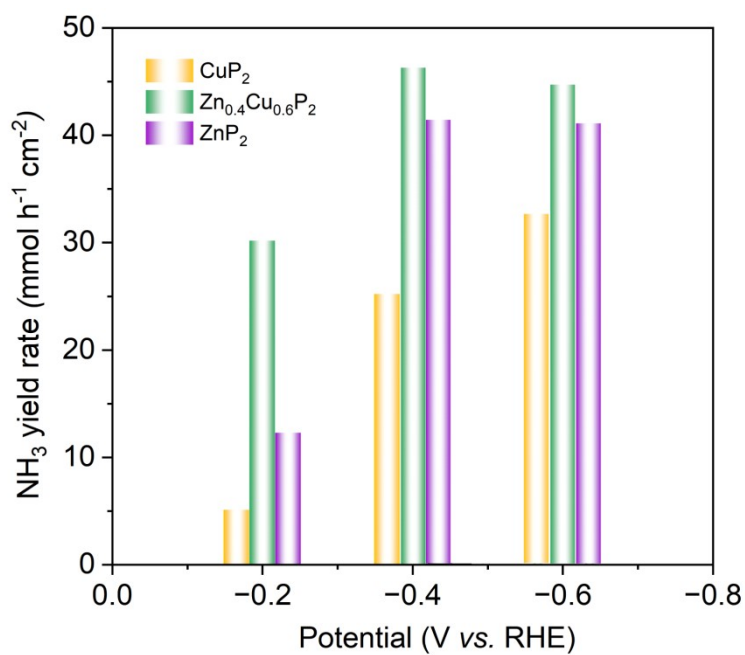

**Fig. S7.**  $\text{NH}_3$  yields of  $\text{eNO}_3\text{RR}$  for the samples at different potentials.

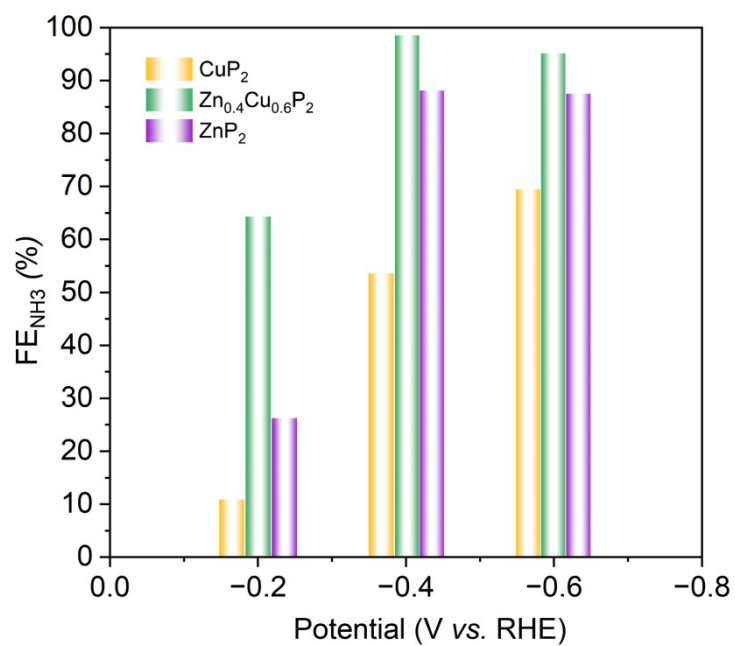

**Fig. S8.** Faradaic efficiencies of  $\text{eNO}_3\text{RR}$  for the samples at different potentials.

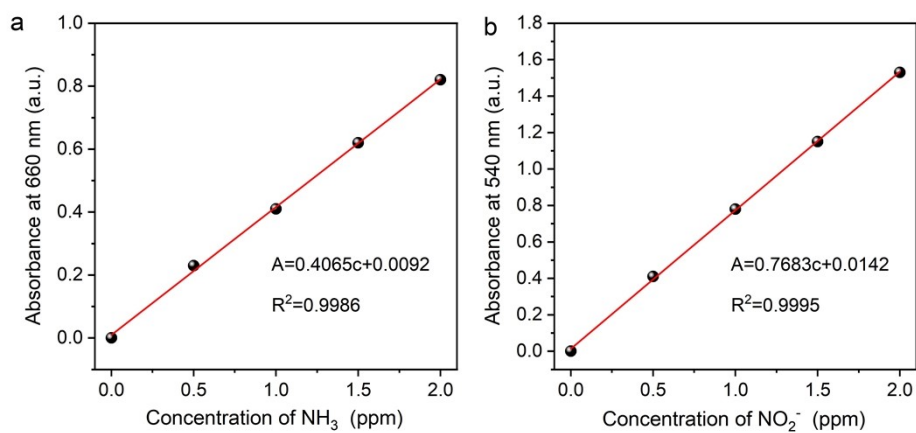

**Fig. S9.** The concentration-absorbance calibration curves for (a) NH<sub>3</sub>, and (b) NO<sub>2</sub><sup>-</sup>.

**Table S1.** ICP-OES results.

| Sample                                             | Element | Element concentration / mg/L | Element content / % |
|----------------------------------------------------|---------|------------------------------|---------------------|
| Zn <sub>0.2</sub> Cu <sub>0.8</sub> P <sub>2</sub> | Zn      | 1.98                         | 5.50%               |
| Zn <sub>0.2</sub> Cu <sub>0.8</sub> P <sub>2</sub> | Cu      | 7.05                         | 19.59%              |
| Zn <sub>0.4</sub> Cu <sub>0.6</sub> P <sub>2</sub> | Zn      | 3.27                         | 9.10%               |
| Zn <sub>0.4</sub> Cu <sub>0.6</sub> P <sub>2</sub> | Cu      | 5.69                         | 15.82%              |
| ZnP <sub>2</sub>                                   | Zn      | 9.09                         | 25.27%              |
| CuP <sub>2</sub>                                   | Cu      | 8.69                         | 24.15%              |
